# Supplementary material for: Rescue of Mitochondrial SIRT3 Ameliorates Ischemia-like Injury in Human Endothelial Cells
Source: MDPI journal article supplement (doi:10.3390/ijms23169118), 2022-08-14
Supplement: s1 [file s1]

## Article

# Rescue of Mitochondrial SIRT3 Ameliorates Ischemia-like Injury in Human Endothelial Cells

Xi Liu <sup>1</sup>, Yi Li <sup>1</sup>, Zhen Zhang <sup>1</sup>, Juan Lu <sup>1</sup>, Gang Pei <sup>1,2,3,\*</sup> and Shichao Huang <sup>1,\*</sup>

- <sup>1</sup> State Key Laboratory of Cell Biology, Shanghai Institute of Biochemistry and Cell Biology, Center for Excellence in Molecular Cell Science, Chinese Academy of Sciences, Shanghai 200031, China  
<sup>2</sup> Shanghai Key Laboratory of Signaling and Disease Research, Laboratory of Receptor-Based Biomedicine, The Collaborative Innovation Center for Brain Science, School of Life Sciences and Technology, Tongji University, Shanghai 200070, China  
<sup>3</sup> Institute for Stem Cell and Regeneration, Chinese Academy of Sciences, Beijing 100045, China  
\* Correspondence: gpei@sibs.ac.cn (G.P.); huangshichao@sibcb.ac.cn (S.H.)

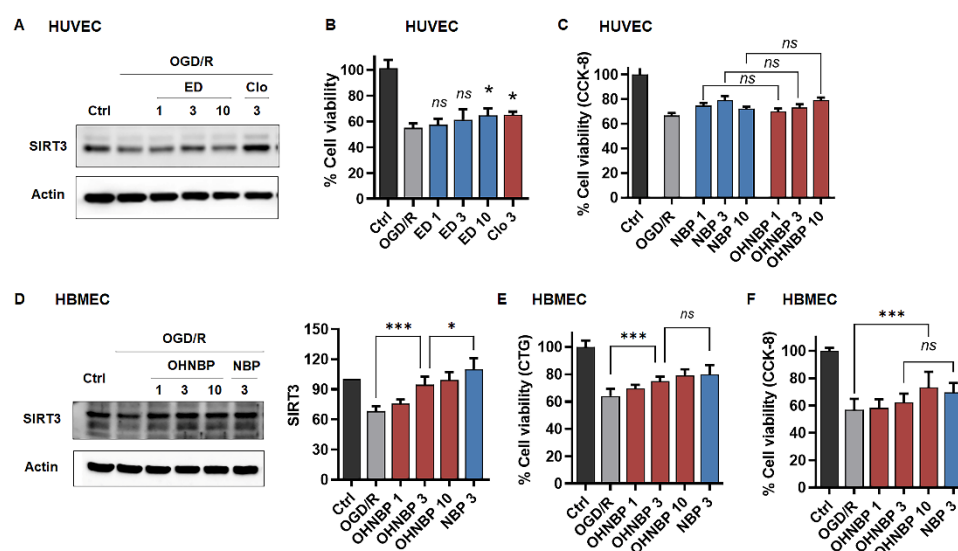

**Figure S1.** Clinical drugs rescue SIRT3 to reduce OGD/R-induced injury. (A) The effect of ED on SIRT3 expression in HUVECs after exposure to OGD/R as assessed by Western Blotting. (B) The effect of ED on cell viability of HUVECs after exposure to OGD/R by using CTG assay. (C) The effect of OHNBP and NBP on cell viability in HUVECs after exposure to OGD/R by using CCK-8 assay. (D) The effect of OHNBP and NBP on SIRT3 expression in HBMECs after exposure to OGD/R as assessed by Western Blotting. (E-F) The effect of OHNBP and NBP on cell viability in HBMECs after exposure to OGD/R by using CTG assay, or CCK-8 assay. The data are presented as the means  $\pm$  SD, and were assessed using one-way ANOVA. \*  $p < 0.05$  vs. the OGD/R group, \*\*\*  $p < 0.001$  vs. the OGD/R group. ns, no significance,  $n = 3$  for all.

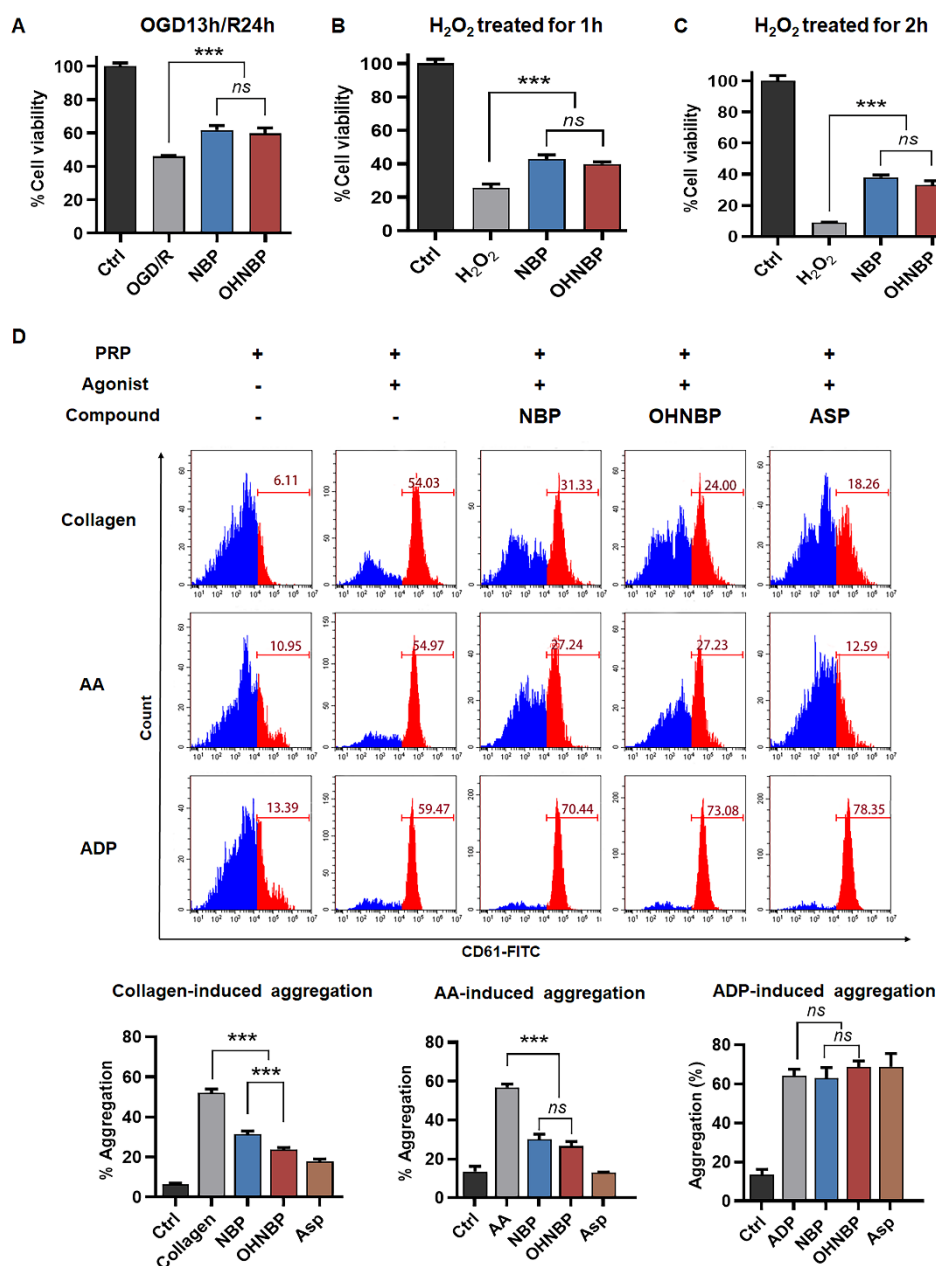

**Figure S2.** OHNBP has better pharmacology effect than NBP in neuroprotection, anti-oxidation, and anti-aggregation. (A) The effect of OHNBP or NBP on cell viability of SK-N-SH cells induced by OGD13.5h/R24h. (B-C) The effect of OHNBP or NBP on cell viability of SK-N-SH cells damaged by 1 mM H<sub>2</sub>O<sub>2</sub> for 1 h or 2 h. (D) The effect of OHNBP, NBP, or Asp on platelet aggregation induced by 10 µg/mL collagen, 1 mM AA, or 10 µM ADP. The data are presented as the means ± SD, and were assessed using one-way ANOVA. \*\*\*  $p < 0.001$ . ns, no significance,  $n = 3$  for all.
